# Supplementary material
Source: Springer Nature journal article supplement (https://www.springermedizin.de/resource/supplementary/12943_2007_363_MOESM7_ESM.pdf/9554018)

fold change

-4 -2 0 2 4

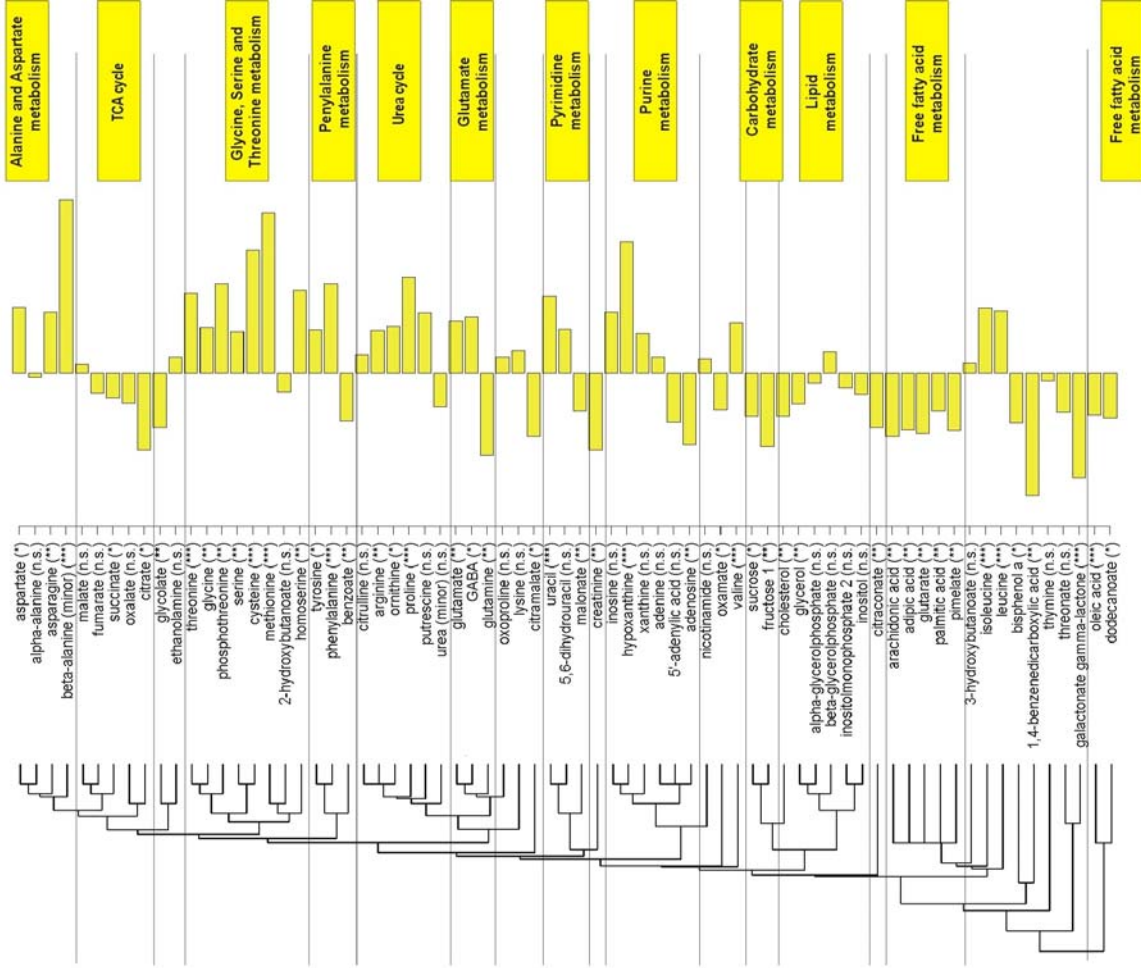

0 2 4 6 8

Supplement: MOESM7 [file 9554018]
